# Supplementary material
Source: PubMed Central journal article supplement (PMC5302190)
Supplement: NIHMS846678-supplement-Supporting_Information.pdf [file NIHMS846678-supplement-Supporting_Information.pdf]

## Supporting Information:

# Shortening the HIV-1 TAR RNA Bulge by a Single Nucleotide Preserves Motional Modes Over a Broad Range of Timescales

Dawn K. Merriman<sup>1</sup>, Yi Xue<sup>2</sup>, Shan Yang<sup>3</sup>, Isaac J. Kimsey<sup>2</sup>, Anisha Shakya<sup>4</sup>, Mary Clay<sup>2</sup>, Hashim M. Al-Hashimi\*<sup>1,2</sup>

*1. Department of Chemistry, Duke University, Durham, North Carolina 27708*

*2. Department of Biochemistry, Duke University Medical Center, Durham, North Carolina 27710*

*3. Baxter Health Care, (Suzhou) Co., Ltd. Suzhou, Jiang Su, 215028 China*

*4. Department of Chemistry and Biophysics, University of Michigan, Ann Arbor, Michigan 48109*

*\*To whom correspondence should be addressed: [hashim.al.hashimi@duke.edu](mailto:hashim.al.hashimi@duke.edu)*

*Tel: 919-660-1113*

### Supporting Discussion 1. G28U-wtTAR and G28U- $\Delta$ C24-wtTAR ES2 trap mutants.

In a prior study<sup>1</sup>, nine resonances belonging to residues U31 (C6H6 and C1'H1'), C30 (C6H6 and C1'H1'), A22 (C8H8 and C1'H1'), G32 (C8H8 and C1'H1'), and U23-C1'H1' could not be unambiguously assigned in G28U-wtTAR. Based on the present study, and assignments of the ES2<sup>uucg</sup> mutant, six of the ambiguous assignments have been resolved and three assignments previously labeled as unambiguous (U23-C6H6, A35-C8H8 and C1'H1') have been corrected. In total, 14 resonances have been corrected or added to the assignments of G28U-TAR: U23-C6H6, C24-C6H6, A22-C8H8 and C1'H1', A35-C8H8 and C1'H1', U40-C6H6 and C1'H1', C39-C6H6, C41-C6H6 and C1'H1', G32-N1H1, U31-N1H1, and G43-N1H1.

Among these resonances U23-C6H6 and A35-C8H8 and C1'H1' were previously not deemed ambiguous, but were updated by switching with ambiguous or unassigned peaks: A22\*-C8H8  $\rightarrow$  A35-C8H8, A22\*-C1'H1'  $\rightarrow$  A35-C1'H1' and U31\*-C6H6  $\rightarrow$  U23-C6H6. Because new assignments retain very similar carbon chemical shifts, they do not impact the prior agreement reported between the ES2 chemical shifts and those measured in wtTAR-G28U mutants or any of the conclusions in the prior TAR ES2 study.

Resonances previously assigned as U38-N3H3 and G36-N1H1 could not be reconciled with additional data shown here on G28U- $\Delta$ C24-wtTAR and the ES2<sup>uucg</sup> traps. This led us to deduce that G28U-TAR is prone to forming kissing dimers or duplexes resulting in a GU resonance in both wtTAR and  $\Delta$ C24-wtTAR (updated assignments: G36-N1H1  $\rightarrow$  G32-N1H1, U38-N3H3  $\rightarrow$  U31-N3H3). Once again, this correction does not affect the prior RD analysis since similar <sup>15</sup>N chemical shifts were maintained for all residues affected.

To expand, NOE connectivity data measured on G28U- $\Delta$ C24-wtTAR yielded a tri-guanine walk in G28U- $\Delta$ C24-wtTAR (Fig S8, highlighted in orange). This walk could not be explained based on the monomeric G28U- $\Delta$ C24-wtTAR secondary structure, but could easily be explained by a kissing dimer or duplex. These NOE connectivities were not observed previously in G28U-wtTAR, possibly due to the lower RNA concentration or poorer resolution in the NOESY spectrum. Indeed, a non-denaturing gel on aliquots of NMR samples used in measuring NOESY spectra (data not shown) shows two well-separated populations for both G28U-wtTAR and G28U- $\Delta$ C24-wtTAR. Therefore, at the high concentrations used to collect unlabeled NMR data ( $\approx$  2-3 mM RNA), G28U-wtTAR forms a kissing dimer or duplex in solution. Indeed, lowering the RNA concentration to  $\approx$  50  $\mu$ M resulted in the disappearance of the imino assigned to the GU mispair. The formation of a GU mispair associated with the kissing dimer or duplex formation also helps explain the unusual chemical shift of the peak previously assigned as U28, which appears in a region of in a 2D NH spectrum typical of GU mispairs and not WC AU bps<sup>2</sup>. It should be noted that there are still unassigned and ambiguous assignments in G28U-TAR due to severe spectral overlap in the non-exchangeable region of the NOESY spectra.

## Supplementary Information Figure Legends

### Figure 1: Secondary structure and assignments of $\Delta$ C24-wtTAR and $\Delta$ C24-TAR<sup>uucg</sup>.

(A) Overlay of 2D HSQC spectra of wtTAR (black) and  $\Delta$ C24-wtTAR (red) where large chemical shift perturbations are highlighted with black lines. (B) Secondary structure (left) and 2D HSQC overlays of  $\Delta$ C24-wtTAR (red) and  $\Delta$ C24-TAR<sup>uucg</sup> (blue). Asterisks highlight apical loop residues that differ between RNA molecules.

**Figure 2: Comparison of chemical shifts for wtTAR and  $\Delta$ C24-wtTAR with and without  $Mg^{2+}$ .** Shown is the secondary structure of wtTAR, highlighting the deleted bulge nucleotide in  $\Delta$ C24-wtTAR with a red X, and 2D HSQC overlays of wtTAR (black),  $\Delta$ C24-wtTAR (red), wtTAR in the presence of 4 mM  $Mg^{2+}$  (orange)<sup>3</sup>. Black lines highlight significant chemical shift perturbations from wtTAR at low salt conditions to  $Mg^{2+}$  bound wtTAR, and  $\Delta$ C24-wtTAR at low salt conditions.

**Figure 3: 2D HSQCs of wtTAR and  $\Delta$ C24-wtTAR in the presence of  $Mg^{2+}$ .** (A) Shown are 2D HSQC overlays of magnesium titrations with wtTAR (top) and  $\Delta$ C24-wtTAR (bottom) at 0 mM (black), 2 mM (blue) and 4 mM (green)  $Mg^{2+}$ . (B) 2D HSQC overlays of wtTAR (black) and  $\Delta$ C24-wtTAR (red) at the 4 mM  $Mg^{2+}$  titration point to highlight the similarities of the spectra in comparison to free wtTAR and  $\Delta$ C24-wtTAR (main Fig 2A, Fig S1A).

**Figure 4:  $^{13}C$  Spin Relaxation comparison.** Shown are correlation plots of  $^{13}C$   $R_1$  (A) and  $R_2$  (B) relaxation rates where residues are colored according to helix 1 (red), helix 2 (blue), bulge (orange), and apical loop (green). See insert for symbols depicting the different spins measured.

**Figure 5: Residual dipolar couplings measured in  $\Delta$ C24-wtTAR.** (A) Comparison of RDCs measured based on splittings encoded in  $^{13}C$  and  $^1H$  dimensions. The unity line is also shown. RMSD was calculated over all RDCs measured and final values utilized for further analyses were obtained from averaging the two sets of RDC measurements (B) 2D overlay of the  $^1H$  downfield and  $^{13}C$  upfield TROSY component for  $\Delta$ C24-wtTAR free



(red) and in the presence of Pf1 phage (blue). (C) Comparison of the measured RDCs in helix 1 (red) and helix 2 (blue) and values back predicted when best fitted to an idealized A-form geometry (see methods).

**Figure 6: RD profiles.** In all cases, RD profiles show the dependence of  $R_2 + R_{ex}$  on spin lock power ( $\omega_{eff}/2\pi$ ) and offset ( $\Omega/2\pi$ ) with global fits (solid lines) to the two-state Laguerre equation (Eq 2)<sup>4</sup>. Error bars represent experimental uncertainty (1 s.d., see methods). (A) RD profiles measured in  $\Delta$ C24-wtTAR (B) RD profiles measured in wtTAR and  $\Delta$ C24-wtTAR in 5 mM  $Mg^{2+}$ . Shown are representative off-resonance (A35-C8) and on resonance (U38-N3) RD profiles measured in wtTAR and  $\Delta$ C24-wtTAR. (C) ES3 RD profiles measured in wtTAR and  $\Delta$ C24-wtTAR.

**Figure 7: MC-Fold results for  $\Delta$ C24-wtTAR.** Shown are the top four results from MC-Fold<sup>5</sup> using standard input options exploring the best 15% sub-optimal structures. Structures are in order as they were ranked from MC-Fold and labeled as the ground state (GS) and excited states (ES) as determined by NMR.

**Figure 8: NMR Spectra of G28U- $\Delta$ C24-wtTAR.** (A) Secondary structure of G28U- $\Delta$ C24-wtTAR with the mutated G to U highlighted in green. (B) Example imino proton NOE connectives that support a kissing or duplex dimer in G28U- $\Delta$ C24-wtTAR. NOE connectivities are colored according to the G28U- $\Delta$ C24-wtTAR secondary structure, with the lower helix formation (black), uridine mispair formation (orange) and upper helix walk (red). (C) Exchangable NOE proton walk for the lower helix of G28U- $\Delta$ C24-wtTAR from residues G17 to U23, and highlighting the strong NOE for G33 H1'-H8 consistent with

G28U-wtTAR and the *syn* conformation of residue G33. (D) 2D HSQC overlay of  $\Delta$ C24-wtTAR (blue) and G28U- $\Delta$ C24-wtTAR (red).

**Figure 9: NMR assignments of wtTAR-ES2<sup>uucg</sup> and  $\Delta$ C24-wtTAR- ES2<sup>uucg</sup>.** Shown are the non-exchangeable NOE walk for wtTAR-ES2<sup>uucg</sup> (A) and  $\Delta$ C24-wtTAR- ES2<sup>uucg</sup> (B) taken at 10°C (left) and exchangeable NOE walks taken at 25°C (right). The imino walks completed are highlighted on the secondary structure inserts. (C) 2D HSQCs of ES2<sup>uucg</sup> traps overlaid on the corresponding spectra of wtTAR and  $\Delta$ C24-wtTAR. Ambiguous assignments in are marked with an asterix.

**Figure 1**

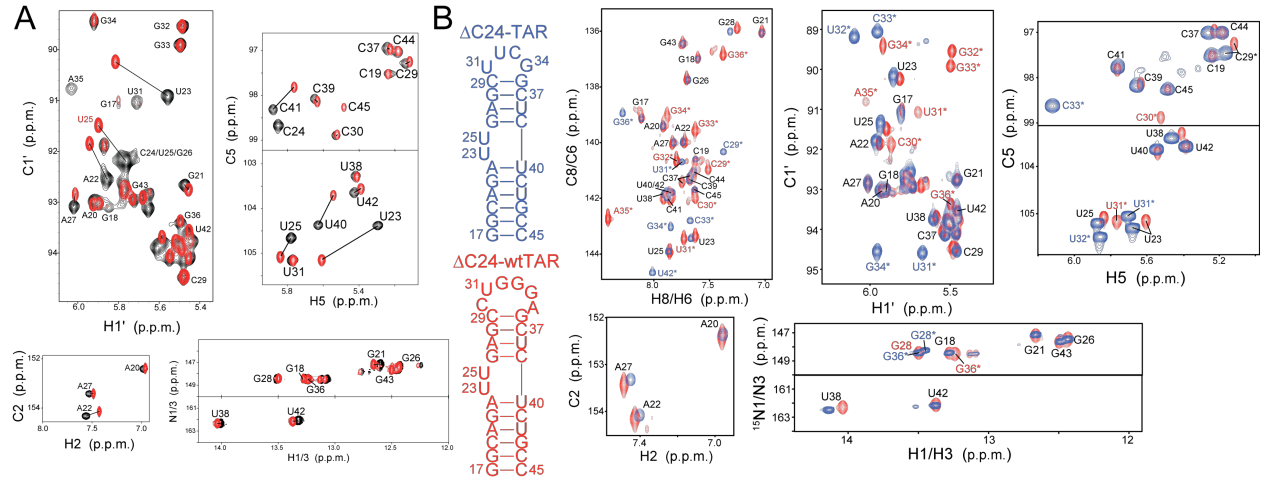

**Figure 2**

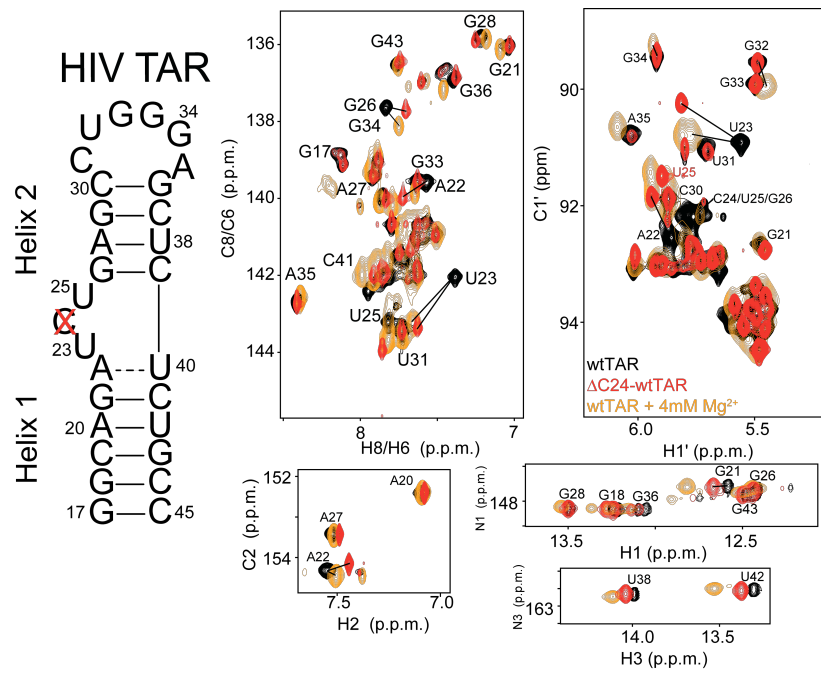

**Figure 3**

**A**

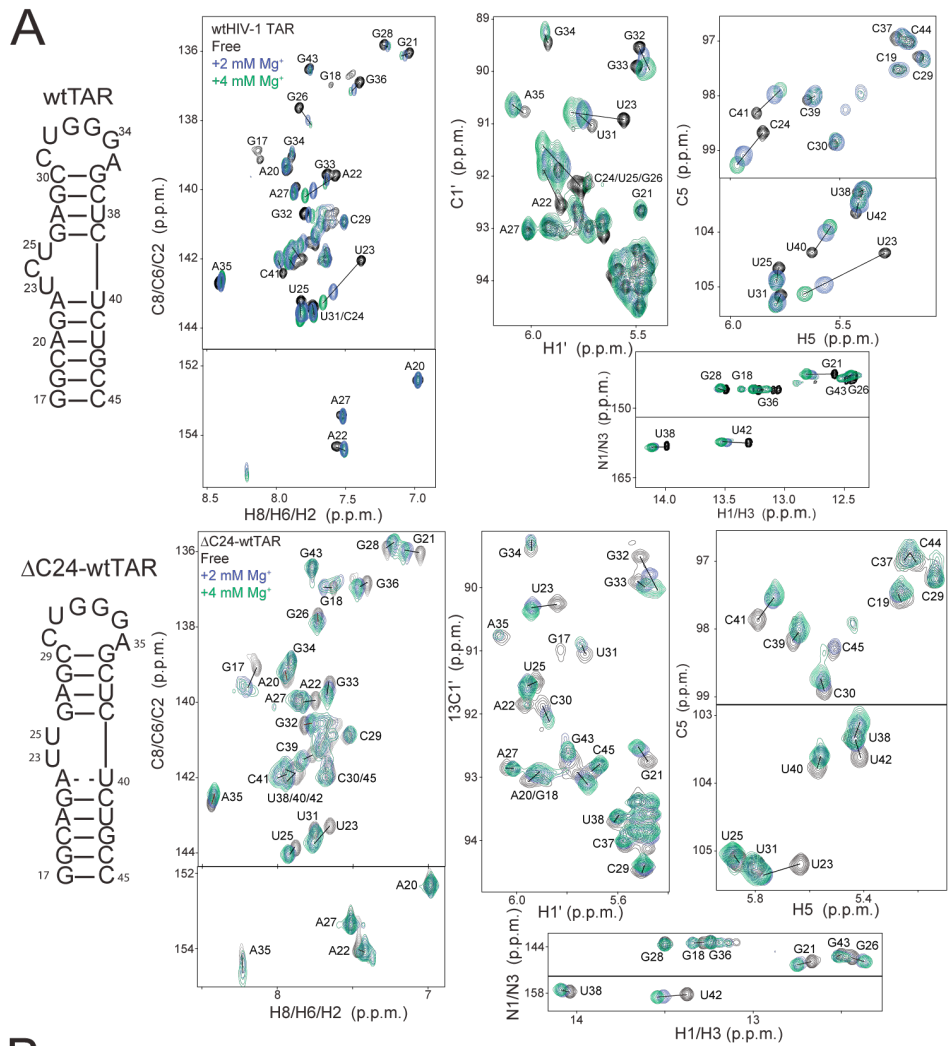

**B**

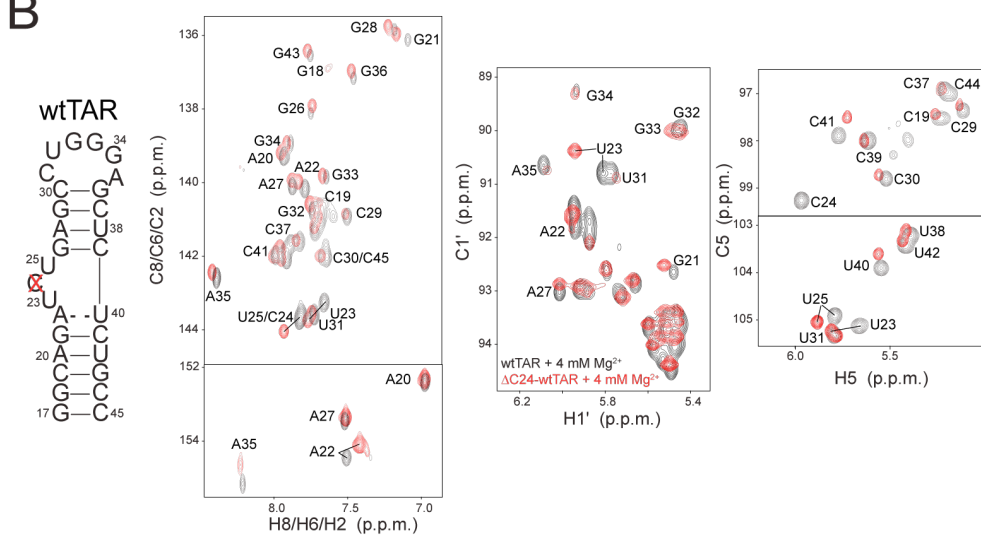

**Figure 4**

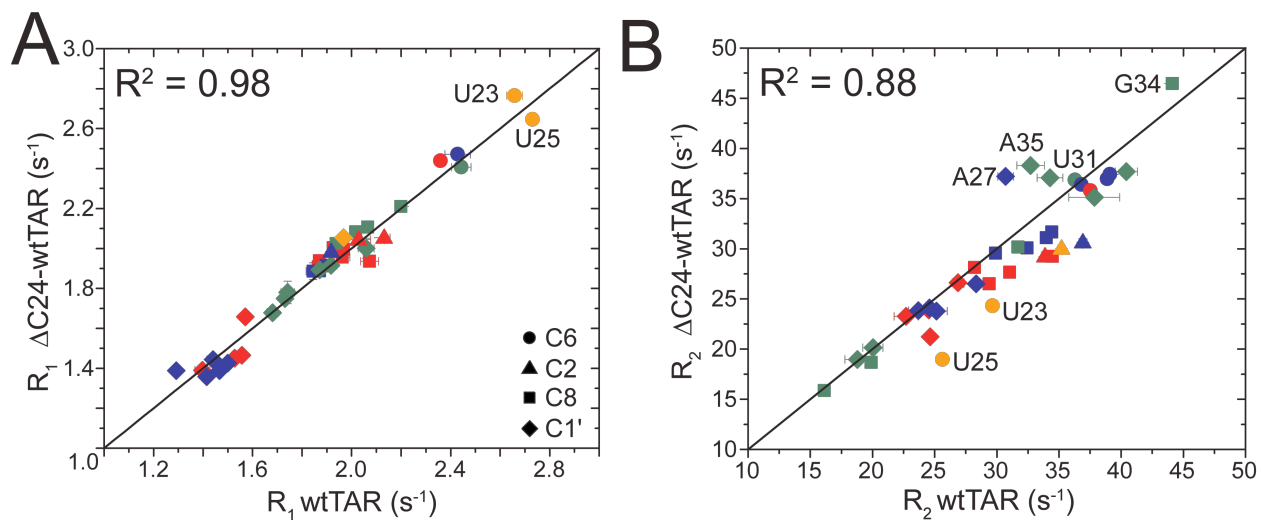

**Figure 5**

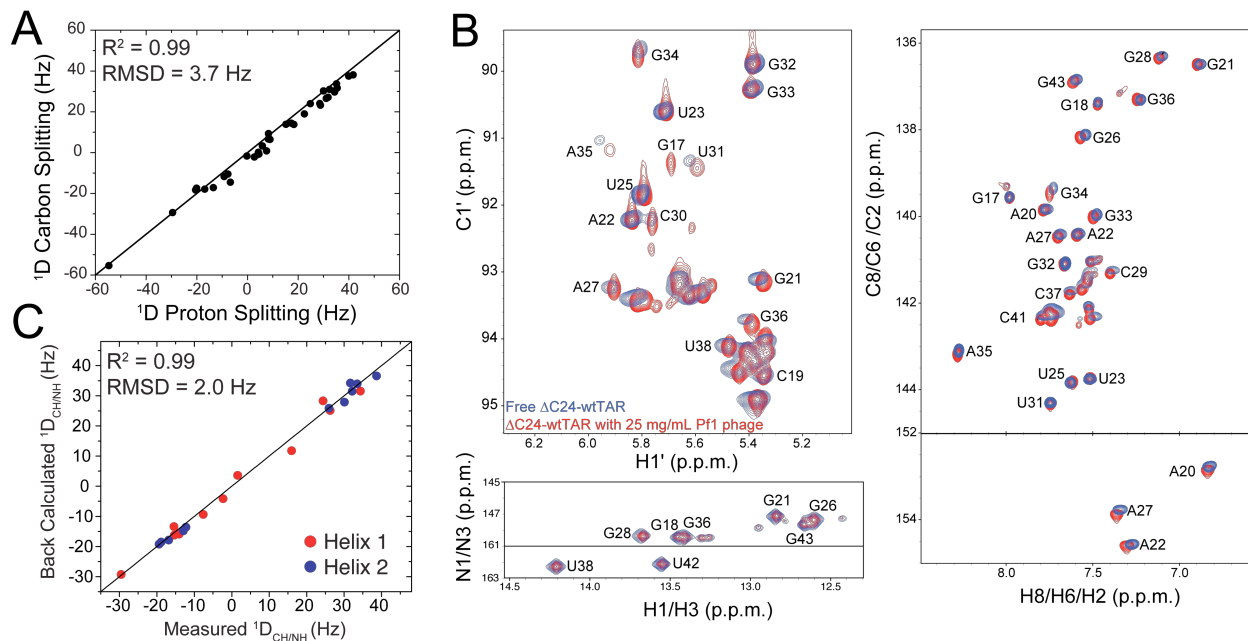

**Figure 6**

**A**

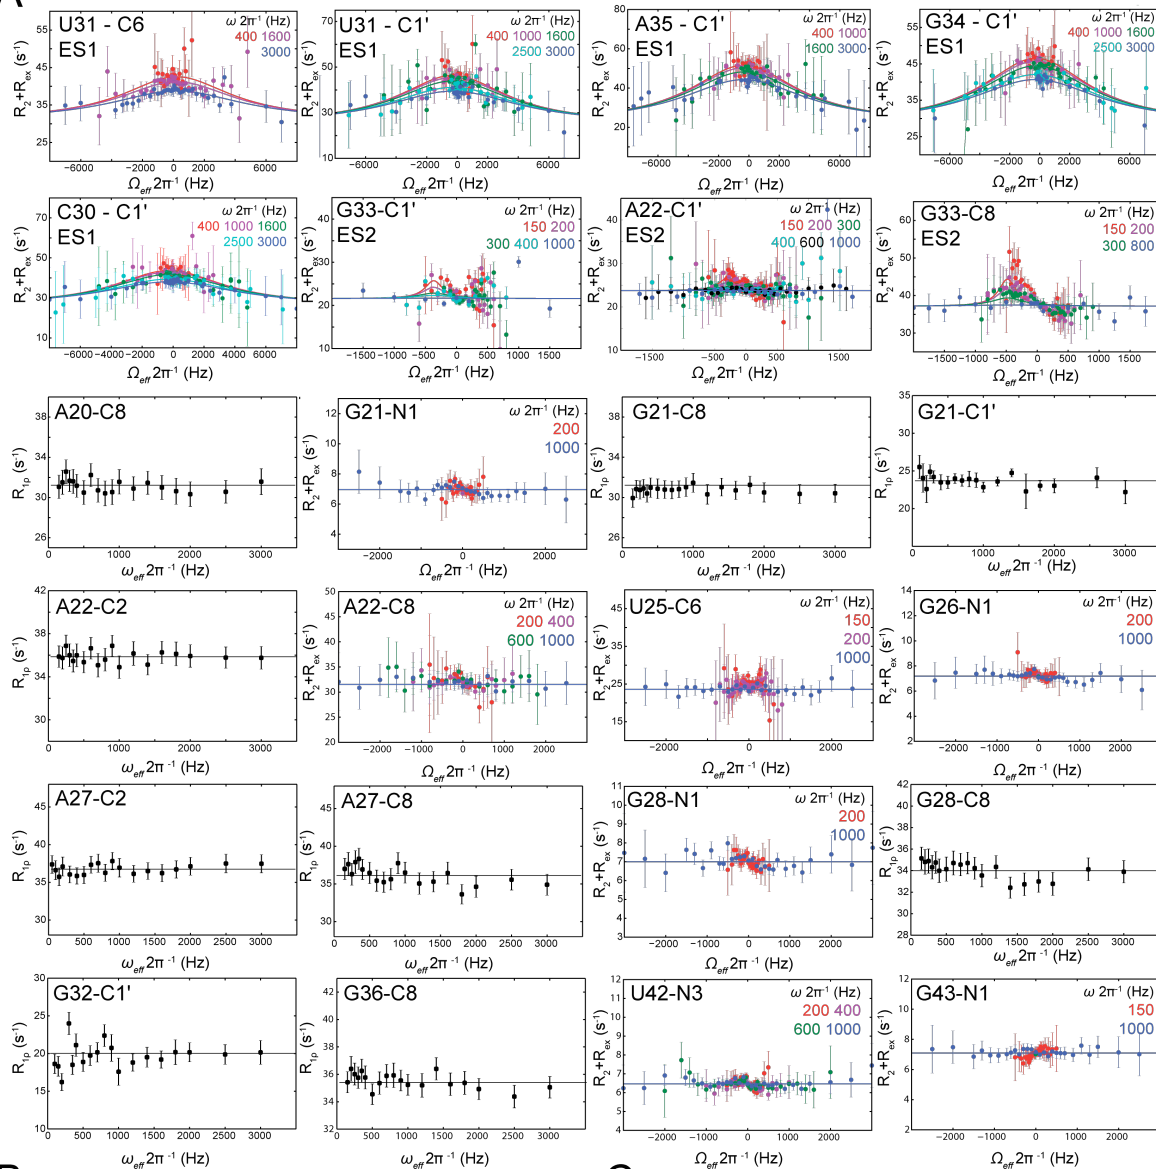

**B**

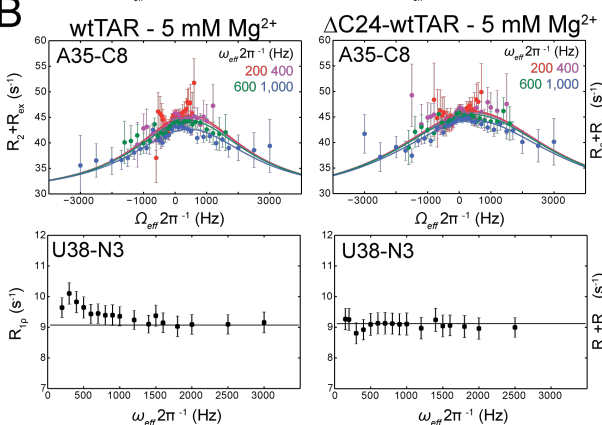

**C**

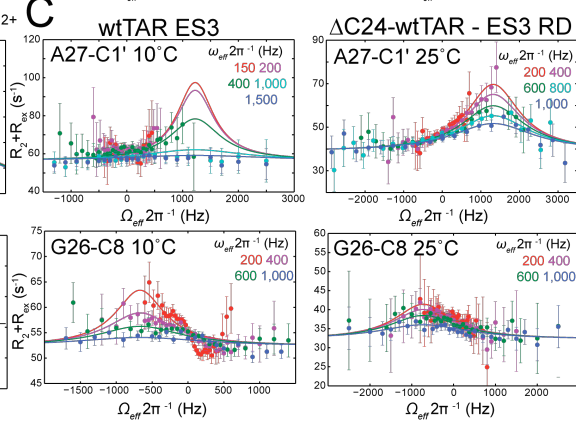

**Figure 7**

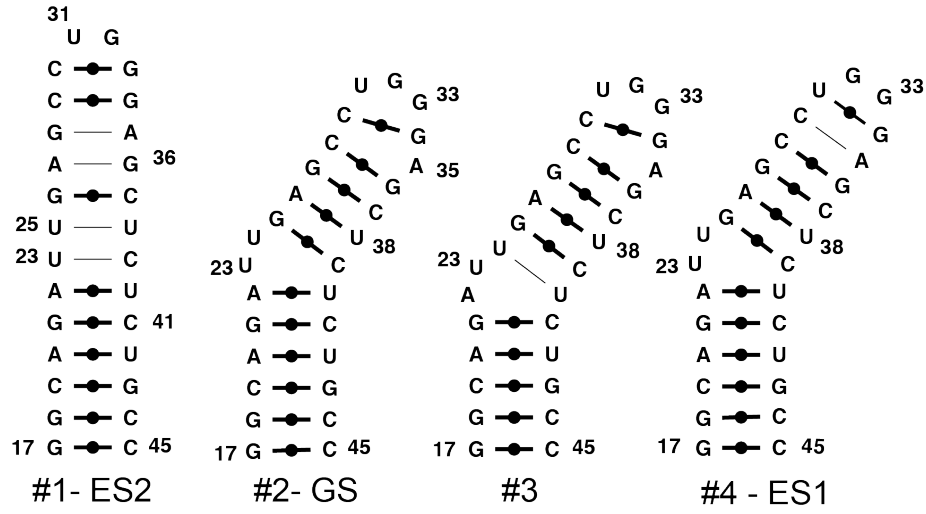

**Figure 8**

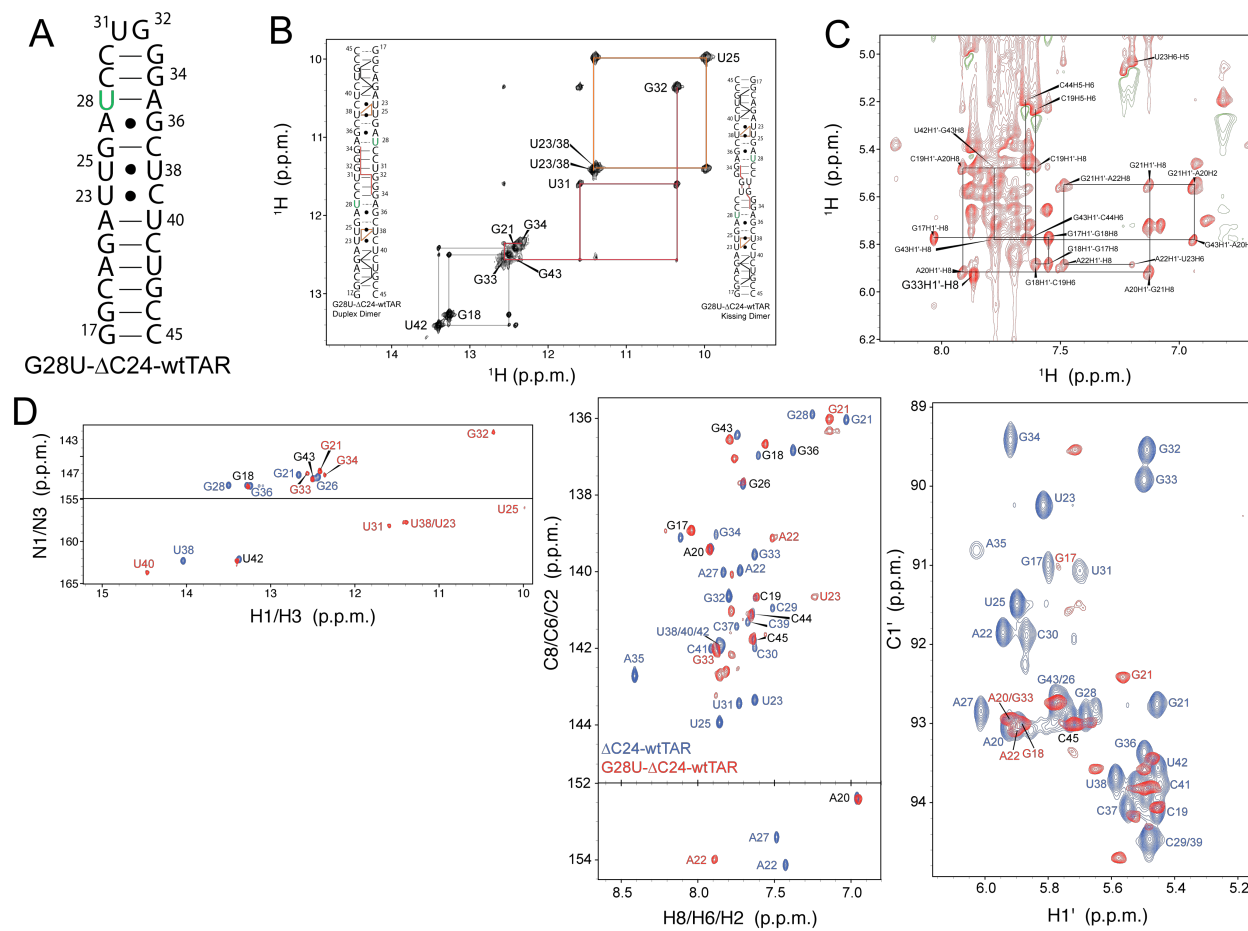



**Figure 9**

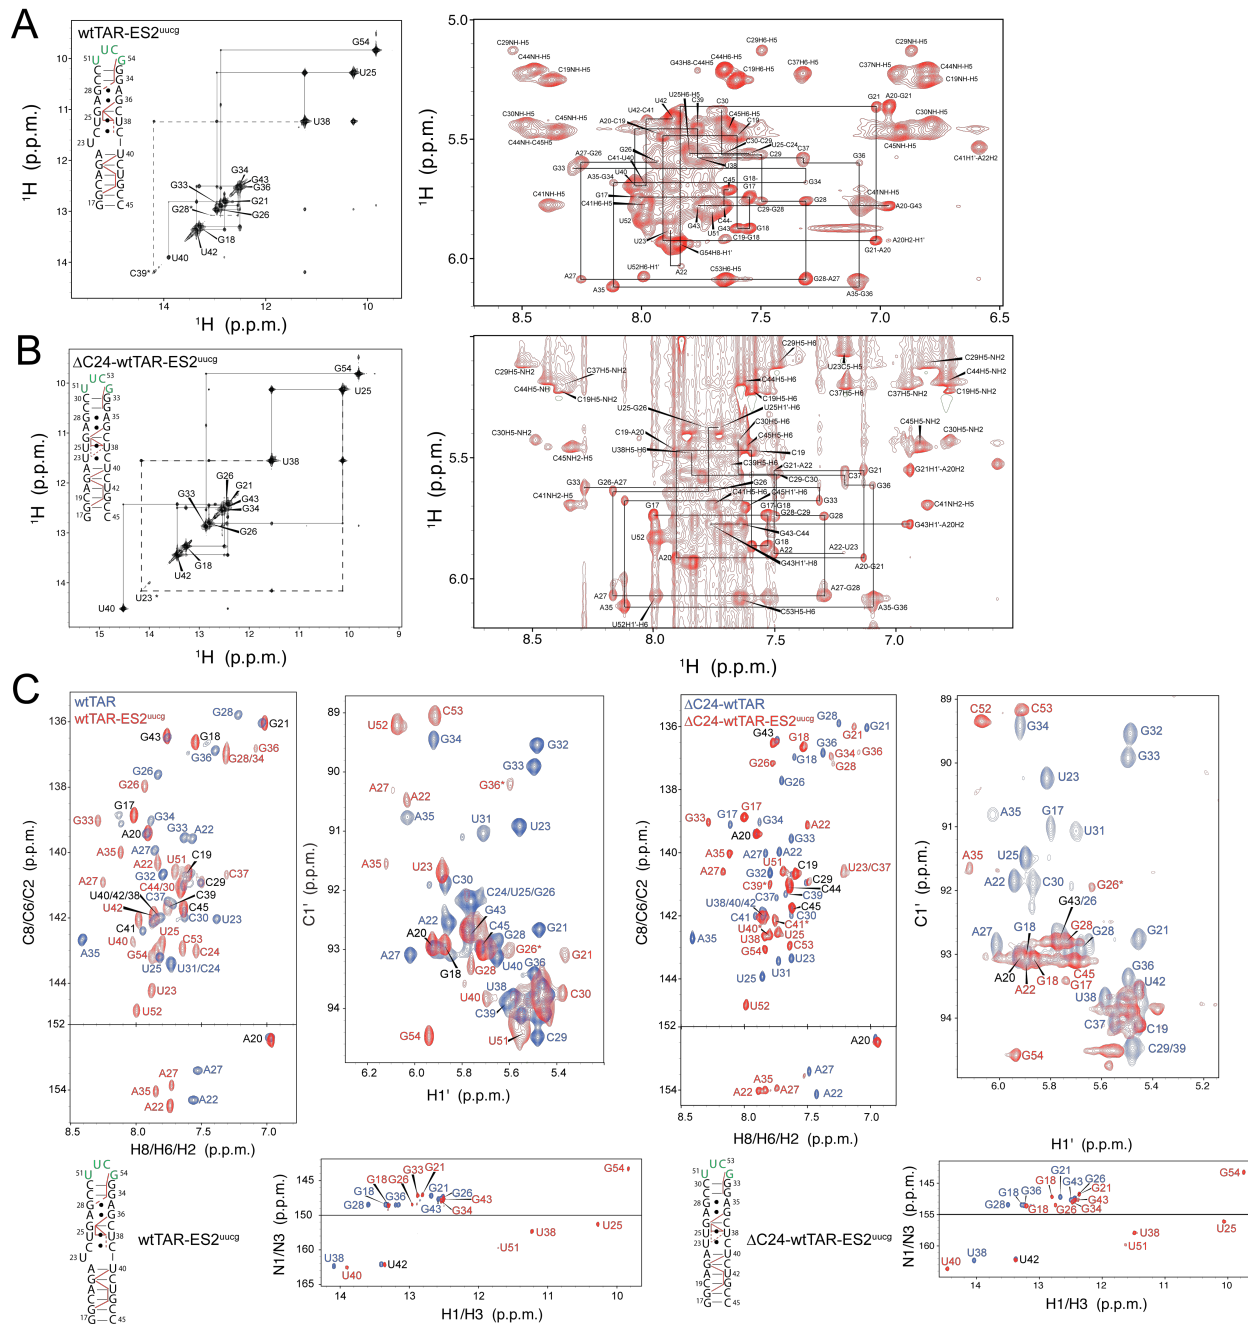

|           |                | wtTAR                            | $\Delta$ C24-wtTAR                         |
|-----------|----------------|----------------------------------|--------------------------------------------|
| Aromatic  | R <sub>1</sub> | 10 (2x), 100, 200, 300, 580 (2x) | 10, 50 (2x), 150, 350 (2x), 500            |
|           | R <sub>2</sub> | 4, 9, 14, 24, 29, 34, 39, 44, 50 | 4, 8 (2x), 16, 20, 24, 28, 32, 36, 40 (2x) |
| Aliphatic | R <sub>1</sub> | 10 (2x), 90, 190, 300, 600 (2x)  | 10 (2x), 90, 190, 300, 440, 600 (2x)       |
|           | R <sub>2</sub> | 0.4 (2x), 4, 10, 20, 40, 42 (2x) | 0.4 (2x), 4, 10, 30, 42 (2x)               |

**Table 1:** Delays (ms) used in R<sub>1</sub> and R<sub>2</sub> relaxation experiments. 2x refers to repeated delays to assist in estimating experimental error.

|     | Atom | R <sub>1</sub> | Error | R <sub>2</sub> | Error |
|-----|------|----------------|-------|----------------|-------|
| G17 | C8   | 1.87           | 0.02  | 29.39          | 0.08  |
| G18 | C1'  | 1.40           | 0.03  | 26.9           | 0.5   |
| A20 | C8   | 1.97           | 0.02  | 28.2           | 0.1   |
|     | C2   | 2.13           | 0.02  | 33.9           | 0.3   |
|     | C1'  | 1.47           | 0.01  | 24.5           | 0.6   |
| G21 | C8   | 1.87           | 0.01  | 34.5           | 0.2   |
|     | C1'  | 1.53           | 0.01  | 23             | 1     |
| A22 | C8   | 1.93           | 0.01  | 31.03          | 0.09  |
|     | C2   | 2.03           | 0.05  | 35.2           | 0.2   |
|     | C1'  | 1.57           | 0.01  | 24.6           | 0.3   |
| U23 | C6   | 2.66           | 0.03  | 29.67          | 0.19  |
|     | C1'  | 1.97           | 0.01  | 17.1           | 0.9   |
| U25 | C6   | 2.73           | 0.01  | 25.64          | 0.07  |
| G26 | C8   | 1.84           | 0.03  | 32.4           | 0.2   |
| A27 | C8   | 1.90           | 0.02  | 29.9           | 0.2   |
|     | C2   | 1.92           | 0.01  | 36.9           | 0.3   |
|     | C1'  | 1.29           | 0.02  | 30.7           | 0.6   |
| G28 | C8   | 1.87           | 0.02  | 34.0           | 0.1   |
|     | C1'  | 1.47           | 0.04  | 23.9           | 0.7   |
| C29 | C6   | 2.43           | 0.05  | 39.1           | 0.3   |
|     | C1'  | 1.44           | 0.02  | 25.1           | 0.9   |
| C30 | C6   | 2.44           | 0.04  | 36.3           | 0.5   |
|     | C1'  | 1.68           | 0.02  | 38             | 2     |
| U31 | C1'  | 1.92           | 0.02  | 34             | 1     |
| G32 | C8   | 2.20           | 0.02  | 19.9           | 0.1   |
|     | C1'  | 1.87           | 0.02  | 19             | 1     |
| G33 | C8   | 2.02           | 0.02  | 31.71          | 0.08  |
|     | C1'  | 1.73           | 0.01  | 20.0           | 0.8   |
| G34 | C8   | 1.94           | 0.01  | 44.1           | 0.3   |
|     | C1'  | 1.74           | 0.03  | 40.4           | 0.9   |
| A35 | C8   | 2.07           | 0.01  | 16.13          | 0.03  |

|     |     |      |      |       |      |
|-----|-----|------|------|-------|------|
|     | C1' | 2.06 | 0.03 | 33    | 1    |
| G36 | C8  | 1.90 | 0.01 | 34.42 | 0.06 |
|     | C1' | 1.41 | 0.01 | 28    | 1    |
| C37 | C6  | 2.40 | 0.03 | 38.9  | 0.1  |
|     | C1' | 1.47 | 0.01 | 24.6  | 0.2  |
| U38 | C1' | 1.50 | 0.01 | 23.7  | 0.8  |
| C39 | C6  | 2.39 | 0.03 | 36.8  | 0.3  |
|     | C1' | 1.52 | 0.01 | 23.9  | 0.6  |
| U40 | C1' | 1.63 | 0.03 | 23    | 1    |
| C41 | C6  | 2.36 | 0.02 | 37.5  | 0.1  |
| U42 | C1' | 1.56 | 0.02 | 24.7  | 0.8  |
| G43 | C8  | 1.96 | 0.03 | 24.7  | 0.8  |
| C45 | C1' | 1.63 | 0.04 | 19.2  | 0.3  |

**Table 2: Carbon  $R_1$  and  $R_2$  relaxation rates ( $s^{-1}$ ) of wtTAR**

|     | Atom | $R_1$ | Error | $R_2$ | Error |
|-----|------|-------|-------|-------|-------|
| G17 | C8   | 1.91  | 0.01  | 26.50 | 0.19  |
| G18 | C8   | 1.94  | 0.01  | 29.31 | 0.19  |
|     | C1'  | 1.39  | 0.01  | 29.31 | 0.19  |
| C19 | C6   | 2.43  | 0.02  | 35.07 | 0.16  |
| A20 | C8   | 2.00  | 0.02  | 28.14 | 0.10  |
|     | C2   | 2.05  | 0.00  | 29.25 | 0.42  |
|     | C1'  | 1.41  | 0.02  | 23.91 | 0.09  |
| G21 | C8   | 1.94  | 0.00  | 29.25 | 0.18  |
|     | C1'  | 1.45  | 0.02  | 23.26 | 0.15  |
| A22 | C8   | 2.00  | 0.02  | 27.65 | 0.19  |
|     | C2   | 2.04  | 0.02  | 30.02 | 0.32  |
|     | C1'  | 1.66  | 0.03  | 21.22 | 0.06  |
| U23 | C6   | 2.76  | 0.00  | 24.31 | 0.07  |
|     | C1'  | 2.05  | 0.03  | 17.98 | 0.11  |
| U25 | C6   | 2.65  | 0.01  | 18.97 | 0.13  |
|     | C1'  | 2.12  | 0.01  | 16.38 | 0.09  |
| G26 | C8   | 1.89  | 0.04  | 30.09 | 0.12  |
| A27 | C8   | 1.92  | 0.03  | 29.55 | 0.10  |
|     | C2   | 1.98  | 0.02  | 30.65 | 0.23  |
|     | C1'  | 1.39  | 0.02  | 37.22 | 0.24  |
| G28 | C8   | 1.89  | 0.01  | 31.09 | 0.18  |
| C29 | C6   | 2.47  | 0.02  | 37.41 | 0.19  |

|     |     |      |      |       |      |
|-----|-----|------|------|-------|------|
|     | C1' | 1.44 | 0.02 | 23.79 | 0.14 |
| C30 | C6  | 2.41 | 0.02 | 36.85 | 0.13 |
|     | C1' | 1.68 | 0.02 | 35.13 | 0.27 |
| U31 | C6  | 2.75 | 0.01 | 28.89 | 0.06 |
|     | C1' | 1.92 | 0.02 | 37.08 | 0.24 |
| G32 | C8  | 2.21 | 0.01 | 18.66 | 0.07 |
|     | C1' | 1.89 | 0.02 | 18.97 | 0.11 |
| G33 | C8  | 2.08 | 0.01 | 30.16 | 0.06 |
|     | C1' | 1.75 | 0.02 | 20.14 | 0.19 |
| G34 | C8  | 2.02 | 0.01 | 46.46 | 0.25 |
|     | C1' | 1.78 | 0.06 | 37.68 | 0.24 |
| A35 | C8  | 2.11 | 0.01 | 15.86 | 0.13 |
|     | C1' | 2.00 | 0.05 | 38.30 | 0.29 |
| G36 | C8  | 1.91 | 0.01 | 31.66 | 0.12 |
|     | C1' | 1.36 | 0.03 | 26.50 | 0.12 |
| C37 | C6  | 2.45 | 0.03 | 36.96 | 0.38 |
|     | C1' | 1.39 | 0.02 | 24.11 | 0.06 |
| U38 | C1' | 1.43 | 0.02 | 23.83 | 0.11 |
| C39 | C6  | 2.44 | 0.03 | 36.39 | 0.08 |
| C41 | C6  | 2.44 | 0.01 | 35.78 | 0.25 |
| G43 | C8  | 1.96 | 0.01 | 29.22 | 0.06 |
|     | C1' | 1.46 | 0.02 | 27.05 | 0.23 |
| C44 | C6  | 2.45 | 0.03 | 35.69 | 0.12 |
| C45 | C6  | 2.44 | 0.01 | 32.98 | 0.22 |

**Table 3: Carbon  $R_1$  and  $R_2$  relaxation rates ( $s^{-1}$ ) of  $\Delta$ C24-wtTAR**

| Residue | Bond Vector | RDC (Hz) |
|---------|-------------|----------|
| G17     | C8H8        | 4.2      |
|         | C1'H1'      | -15.3    |
| G18     | C8H8        | 1.6      |
|         | N1H1        | -2.3     |
| C19     | C1'H1'      | -1.8     |
| A20     | C8H8        | 26.3     |
|         | C2H2        | 16.0     |
| G21     | C8H8        | 34.4     |
|         | C1'H1'      | -29.5    |
|         | N1H1        | -15.4    |
| A22     | C8H8        | 28.8     |
|         | C2H2        | 29.5     |
|         | C1'H1'      | 8.8      |
| U23     | C6H6        | 13.8     |
|         | C1'H1'      | 7.5      |
| U25     | C6H6        | 1.8      |
|         | C1'H1'      | -9.1     |
| G26     | C8H8        | 32.2     |
|         | N1H1        | -12.9    |
| A27     | C8H8        | 26.0     |
|         | C2H2        | 33.5     |
|         | C1'H1'      | -19.4    |
| G28     | C8H8        | 30.1     |
|         | N1H1        | -16.8    |
| C29     | C6H6        | 38.7     |
| C30     | C1'H1'      | 7.7      |
| U31     | C6H6        | -9.7     |
|         | C1'H1'      | -10.5    |
| G32     | C8H8        | 0.3      |
|         | C1'H1'      | 4.6      |
| G33     | C8H8        | 20.7     |
|         | C1'H1'      | -1.0     |
| G34     | C8H8        | 32.0     |
|         | C1'H1'      | 14.5     |
| A35     | C8H8        | 2.2      |
|         | C1'H1'      | -17.4    |
| G36     | C8H8        | 39.9     |

|     |        |       |
|-----|--------|-------|
|     | C1'H1' | -55.0 |
|     | N1H1   | -40.7 |
| C37 | C6H6   | 31.7  |
| U38 | C1'H1' | -18.8 |
|     | N3H3   | -12.2 |
| U42 | N3H3   | -14.0 |
| G43 | C8H8   | 24.4  |
|     | N1H1   | -7.6  |

**Table 4:** RDCs measured on  $\Delta$ C24-wtTAR at 25°C in 15 mM sodium phosphate 25 mM sodium chloride and 0.1 mM EDTA at pH 6.4. Estimated error is 3.7 Hz (see methods).

**Table 5:** List of spin-lock powers and offsets used for  $R_{1\rho}$  experiments

| $\Delta$ C24-wtTAR at 25°C | On-resonance spinlock power (Hz)/Off-resonance spinlock power (Hz) with [offsets]                                                                                                              |
|----------------------------|------------------------------------------------------------------------------------------------------------------------------------------------------------------------------------------------|
| A20 – C8                   | 150, 200, 250, 300, 350, 400, 500, 600, 700, 800, 900, 1000, 1200, 1400, 1600, 1800, 2000, 2500, 3000                                                                                          |
| G21 – C8                   | 150, 200, 250, 300, 350, 400, 500, 600, 700, 800, 900, 1000, 1200, 1400, 1600, 1800, 2000, 2500, 3000                                                                                          |
| G21 – C1'                  | 150, 200, 250, 300, 350, 400, 500, 600, 700, 800, 900, 1000, 1200, 1400, 1600, 1800, 2000, 2500, 3000                                                                                          |
| G21 – N1                   | 100, 150, 200, 250, 300, 350, 400, 500, 600, 700, 800, 900, 1000, 1200, 1400, 1600, 1800, 2000<br>200 & $\pm$ [20, 40, 60, 80, 100, 120, 140, 160, 180, 200, 225, 250, 300, 350, 400, 500]     |
|                            | 1000 & $\pm$ [100, 200, 300, 400, 500, 600, 700, 900, 1100, 1300, 1500, 2000, 2500, 3000, 3500, 4000]                                                                                          |
| G21 – N1                   | 100, 150, 200, 250, 300, 350, 400, 500, 600, 700, 800, 900, 1000, 1200, 1400, 1600, 1800, 2000<br>200 & $\pm$ [20, 20, 40, 60, 80, 100, 120, 140, 160, 180, 200, 225, 250, 300, 350, 400, 500] |
|                            | 1000 & $\pm$ [100, 200, 300, 400, 500, 600, 700, 900, 1100, 1300, 1500, 2000, 2500, 3000, 3500, 4000]                                                                                          |
|                            | 50, 100, 150, 200, 250, 300, 350, 400, 500, 600, 700, 800, 900, 1000, 1200, 1400, 1600, 1800, 2000, 2500, 3000, 3500                                                                           |
| A22 – C8                   | 100 & $\pm$ [50, 100, 150, 200, 250, 300, 350, 400, 450], [-500]                                                                                                                               |
|                            | 200 & [-800] $\pm$ [50, 100, 150, 200, 300, 400, 500, 600, 700]                                                                                                                                |
|                            | 400 & $\pm$ [100, 200, 300, 400, 500, 600, 700, 800, 1000, 1200]                                                                                                                               |
|                            | 600 & [100, 200, 400, 600, 800, 1000, 1200, 1400, 1600, 1800]                                                                                                                                  |
|                            | 1000 & [-3000] $\pm$ [200, 400, 600, 800, 1200, 1600, 2000, 2500]                                                                                                                              |
| A22 – C1'                  | 150, 200, 250, 300, 350, 400, 500, 600, 700, 800, 900, 1000, 1200, 1400, 1600, 1800, 2000, 2500, 3000, 3500                                                                                    |
|                            | 150 & $\pm$ [20, 40, 60, 80, 100, 120, 140, 160, 180, 200, 220, 240, 260, 280, 300, 320, 400, 500, 600]                                                                                        |
|                            | 200 & $\pm$ [30, 60, 90, 120, 150, 180, 210, 240, 270, 300, 330, 360, 390, 420, 480, 540, 600, 700, 800]                                                                                       |
|                            | 300 & $\pm$ [40, 80, 120, 160, 200, 240, 280, 320, 360, 400, 440, 480, 520, 560, 600, 700, 800, 1000, 1200]                                                                                    |
|                            | 400 & $\pm$ [50, 100, 150, 200, 250, 300, 350, 400, 450, 500, 550, 600, 700, 800, 900, 1000, 1200, 1500]                                                                                       |

|           |                                                                                                                  |
|-----------|------------------------------------------------------------------------------------------------------------------|
|           | 600 & ± [75, 150, 225, 300, 375, 450, 550, 650, 800, 1000, 1200, 1400, 1600, 2000, 2500, 3000, 4000, 5000]       |
|           | 1000 & [1300] ± [100, 200, 300, 400, 500, 700, 900, 1100, 1500, 1700, 2000, 2500, 3000, 3500, 4000, 5000, 7500]  |
| A22 – C2  | 150, 200, 250, 300, 350, 400, 500, 600, 700, 800, 900, 1000, 1200, 1400, 1600, 1800, 2000, 2500, 3000, 3500      |
| U23 – C6  | 250, 300, 350, 400, 500, 600, 700, 800, 900, 1000, 1200, 1400, 1600, 1800, 2000, 2500, 3000, 3500                |
|           | 200 & [-30] ± [60, 90, 120, 150, 180, 210, 240, 270, 300, 330, 360, 390, 420, 480, 540, 600, 700, 800]           |
|           | 400 & ± [50, 100, 150, 200, 250, 300, 350, 400, 450, 500, 550, 600, 700, 800, 900, 1000, 1200, 1500]             |
|           | 600 & [375, 450, 550, 650, 800, 1000, 1200, 1400, 1600, 2000, 2500, 3000, 4000, 5000]                            |
|           | 1000 & ± [100, 200, 300, 400, 500, 700, 900, 1100, 1300, 1500, 1700, 2000, 2500, 3000, 3500, 4000, 5000, 7500]   |
| U25 – C6  | 150, 200, 250, 300, 350, 400, 500, 600, 700, 800, 900, 1000, 1200, 1400, 1600, 1800, 2000, 2500, 3000, 3500      |
|           | 150 & ± [20, 40, 60, 80, 100, 120, 140, 160, 180, 200, 220, 240, 260, 280, 300, 320, 400, 500, 600]              |
|           | 200 & ± [30, 60, 90, 120, 150, 180, 210, 240, 270, 300, 330, 360, 390, 420, 480, 540, 600, 700, 800]             |
|           | 1000 & ± [100, 200, 300, 400, 500, 700, 900, 1100, 1300, 1500, 1700, 2000, 2500, 3000, 3500, 4000, 5000, 7500]   |
| G26 – N1  | 100, 150, 200, 250, 300, 350, 400, 500, 600, 700, 800, 900, 1000, 1200, 1400, 1600, 1800, 2000                   |
|           | 200 & ± [20, 20, 40, 60, 80, 100, 120, 140, 160, 180, 200, 225, 250, 300, 350, 400, 500]                         |
|           | 1000 & ± [100, 200, 300, 400, 500, 600, 700, 900, 1100, 1300, 1500, 2000, 2500, 3000, 3500, 4000]                |
| G26 – C8  | 150, 200, 250, 300, 350, 400, 500, 600, 700, 800, 900, 1000, 1200, 1400, 1600, 1800, 2000, 2500, 3000, 3500      |
|           | 200 & ± [30, 60, 90, 120, 150, 180, 210, 240, 270, 300, 330, 360, 390, 420, 480, 540, 600, 700, 800]             |
|           | 400 & ± [50, 100, 150, 200, 250, 300, 350, 400, 450, 500, 550, 600, 700, 800, 900, 1000, 1200, 1500]             |
|           | 600 & ± [75, 150, 225, 300, 375, 450, 550, 650, 800, 1000, 1200, 1400, 1600, 2000, 2500, 3000, 4000, 5000]       |
|           | 1000 & ± [100, 200, 300, 400, 500, 700, 900, 1100, 1300, 1500, 1700, 2000, 2500, 3000, 3500, 4000, 5000, 7500]   |
| A27 – C2  | 150, 200, 250, 300, 350, 400, 500, 600, 700, 800, 900, 1000, 1200, 1400, 1600, 1800, 2000, 2500, 3000, 3500      |
| A27 – C8  | 150, 200, 250, 300, 350, 400, 500, 600, 700, 800, 900, 1000, 1200, 1400, 1600, 1800, 2000, 2500, 3000, 3500      |
| A27 – C1' | 150, 200, 250, 300, 350, 400, 500, 600, 700, 800, 900, 1000, 1200, 1400, 1600, 1800, 2000, 2500, 3000, 3500      |
|           | 200 & ± [10, 64, 128, 192, 256, 320, 384, 448, 512, 576, 640, 700]                                               |
|           | 400 & ± [10, 127, 254, 381, 508, 635, 762, 889, 1016, 1143, 1270, 1400]                                          |
|           | 600 & [1528] ± [10, 191, 382, 573, 764, 955, 1146, 1719, 1910, 2100]                                             |
|           | 800 & ± [10, 255, 510, 765, 1020, 1275, 1785, 2040, 2295, 2550, 2800]                                            |
|           | 1000 & [1590] ± [10, 318, 636, 954, 1272, 1590, 1908, 2226, 2544, 2862, 3180]                                    |
| G28 – C8  | 150, 200, 250, 300, 350, 400, 500, 600, 700, 800, 900, 1000, 1200, 1400, 1600, 1800, 2000, 2500, 3000, 3500      |
| G28 – N1  | 100, 150, 200, 250, 300, 350, 400, 500, 600, 700, 800, 900, 1000, 1200, 1400, 1600, 1800, 2000                   |
| C30 – C1' | 100, 150, 200, 250, 300, 350, 400, 500, 600, 700, 800, 900, 1000, 1200, 1400, 1600, 1800, 2000, 2500, 3000, 3500 |

|           |                                                                                                                                                   |
|-----------|---------------------------------------------------------------------------------------------------------------------------------------------------|
|           | 400 & ± [50, 100, 200, 300, 400, 500, 600, 700, 800, 1000]                                                                                        |
|           | 1000 & [1250] ± [50, -100, 250, 500, 750, 1000, 1500, 2000, 2300, 2600]                                                                           |
|           | 1600 & [1000, 1400] ± [50, 100, 200, 300, 400, 500, 800, 900, 1000, 1400, 1550, 1750, 2000, 2600, 3200, 3740, 3200, 3740, 4270, 4800, 3740, 4270] |
|           | 2500 & [800, 900, 1750] ± [50, 100, 200, 300, 400, 500, 2000, 1550, 2600, 3200, 3740, 4270, 4800, 5000, 7100]                                     |
|           | 3000 & [750, 1000, 1500] ± [50, 150, 200, 300, 450, 500, 1900, 2000, 2400, 3000, 4000, 6000, 7000, 8000, 9000]                                    |
| U31 – C1' | 100, 150, 200, 250, 300, 350, 400, 500, 600, 700, 800, 900, 1000, 1200, 1400, 1600, 1800, 2000, 2500, 3000, 3500                                  |
|           | 400 & ± [50, 100, 200, 300, 400, 500, 600, 700, 800, 1000]                                                                                        |
|           | 1000 & [1000, 1250] ± [50, 100, 250, 500, 750, 900, 1500, 1400, 2000, 2300, 2600]                                                                 |
|           | 1600 & [1000, 1200, 1400] ± [50, 100, 200, 300, 400, 500, 800, 900, 1550, 1750, 2000, 2600, 3200, 3740, 4270, 4800]                               |
|           | 2500 & [625, 900, 1250, 1000] ± [50, 100, 125, 250, 375, 500, 1875, 1550, 2000, 2500, 3125, 3740, 4270, 4800]                                     |
|           | 3000 & [450, 500, 750, 1000] ± [50, 100, 200, 300, 2000, 2400, 3000, 4000, 6000, 7000, 9000]                                                      |
| U31 – C6  | 250, 300, 350, 400, 500, 600, 700, 800, 900, 1000, 1200, 1400, 1600, 1800, 2000, 2500, 3000, 3500                                                 |
|           | 400 & ± [50, 100, 200, 300, 400, 500, 600, 700, 800, 1000]                                                                                        |
|           | 1600 & ± [50, 100, 200, 300, 400, 600, 800, 1000, 1200, 1400, 1750, 2000, 2100, 2600, 3200, 3740, 4270, 4800]                                     |
|           | 3000 & ± [50, 150, 300, 450, 600, 750, 1000, 1250, 1500, 1900, 2250, 2625, 3000, 3300, 3750, 6000, 7000, 8000, 9000]                              |
| G32 – C1' | 150, 200, 250, 300, 350, 400, 500, 600, 700, 800, 900, 1000, 1200, 1400, 1600, 1800, 2000, 2500, 3000, 3500                                       |
| G33 – C1' | 50, 100, 150, 200, 300, 400, 500, 600, 700, 800, 900, 1000, 1200, 1400, 1600, 1800, 2000, 2500, 3000, 3500                                        |
|           | 150 & [275, 325, 350, 375, 425, 450, 550, 600, -100, -500] ± [50, 150, 200, 250, 300, 400]                                                        |
|           | 200 & [150, 250, 275, 325, 350, 375, 425, 450, 500, 550, 700] ± [50, 100, 200, 300, 400, 600]                                                     |
|           | 300 & [150, 250, 275, 300, 325, 350, 375, 400, 425, 450, 500, 550, 600, 700, 800] ± [50, 100, 200]                                                |
|           | 400 & [-100] ± [50, 200, 300, 400, 500, 600, 800]                                                                                                 |
|           | 1000 & [-500, -2500] ± [200, 1000, 1500, 2000, 3000]                                                                                              |
| G33 – C8  | 150, 200, 250, 300, 350, 400, 500, 600, 700, 800, 900, 1000, 1200, 1400, 1600, 1800, 2000, 2500, 3000, 3500                                       |
|           | 150 & ± [50, 100, 150, 200, 250, 275, 300, 325, 350, 375, 400, 420, 450, 500]                                                                     |
|           | 200 & [-800] ± [50, 100, 150, 200, 250, 275, 300, 325, 350, 375, 400, 425, 450, 500, 550, 600, 700]                                               |
|           | 300 & ± [50, 100, 200, 250, 275, 300, 325, 350, 375, 400, 425, 450, 500, 550, 600, 700, 800, 900]                                                 |
|           | 800 & ± [50, 100, 250, 500, 750, 1000, 1250, 1500, 1750, 2000]                                                                                    |
| G34 – C1' | 150, 200, 250, 300, 350, 400, 500, 600, 700, 800, 900, 1000, 1200, 1400, 1600, 1800, 2000, 2500, 3000, 3500                                       |
|           | 400 & [1000] ± [50, 100, 200, 300, 400, 500, 600, 700, 800]                                                                                       |
|           | 1000 & [1000] ± [50, 100, 250, 500, 750, 800, 1250, 1500, 1400, 2000, 2300, 2600]                                                                 |
|           | 1600 & [700, 800, 900, 1200, 1300, 1400] ± [50, 100, 200, 300, 400, 600, 1300, 1750, 2000, 2600, 3200, 3740, 4270, 4800]                          |
|           | 2500 [375, 500] & ± [50, 100, 125, 250, 1600, 1875, 2500, 3125, 3750, 4250, 4800, 5000, 7100]                                                     |
|           | 3000 & [300, 450, 500, 750] ± [50, 100, 200, 2000, 3000, 4000, 7000]                                                                              |
| G34 – C8  | 150, 200, 250, 300, 350, 400, 500, 600, 700, 800, 900, 1000, 1200, 1400, 1600, 1800, 2000, 2500, 3000, 3500                                       |
|           | 400 & ± [50, 100, 200, 300, 400, 500, 600, 700, 800, 1000]                                                                                        |
|           | 1600 & ± [50, 100, 200, 300, 400, 600, 800, 1000, 1200, 1400, 1750, 2000, 2600, 3200, 3740,                                                       |



|           |                                                                                                                                               |
|-----------|-----------------------------------------------------------------------------------------------------------------------------------------------|
|           | 4270]                                                                                                                                         |
|           | 2300 & ± [50, 125, 250, 375, 500, 650, 825, 1150, 1800, 2200, 3000, 4000, 4500, 5000]                                                         |
|           | 3000 & ± [50, 150, 300, 450, 600, 750, 900, 1000, 1300, 1500, 1900, 2250, 2625, 3000, 3300, 3750, 6000, 7000, 8000, 9000]                     |
| A35 – C1' | 150, 200, 250, 300, 350, 400, 500, 600, 700, 800, 900, 1000, 1200, 1400, 1600, 1800, 2000, 2500, 3000, 3500                                   |
|           | 400 & ± [50, 100, 200, 300, 400, 500, 600, 700, 800, 1000]                                                                                    |
|           | 1000 & [1000, 1250] ± [50, 100, 250, 500, 750, 900, 1500, 1400, 2000, 2300, 2600]                                                             |
|           | 1600 & [800, 900, 1000, 1200, 1400] ± [50, 100, 200, 300, 400, 500, 1550, 1750, 2100, 2600, 3200, 3740, 4270, 4800]                           |
|           | 2500 & [625, 1250, 1000,] ± [50, 100, 250, 500, 1875, 2000, 3125, 3750, 4250, 4800, 5000, 6600, 7100, 7600]                                   |
| A35 – C8  | 100, 150, 200, 300, 350, 400, 500, 600, 700, 800, 900, 1000, 1200, 1400, 1600, 1800, 2000, 2500, 3000, 3500                                   |
|           | 150 & [-500, -550] ± [50, 100, 150, 200, 250, 300, 350, 400, 450]                                                                             |
|           | 200 & [-800] ± [50, 100, 150, 200, 250, 300, 350, 400, 450, 500, 550, 600, 700]                                                               |
|           | 300 & ± [50, 100, 200, 300, 350, 400, 450, 500, 600, 700, 800, 1000]                                                                          |
|           | 400 & [600, 800, 1000, 1200]                                                                                                                  |
| G36 – C8  | 1000 & ± [200, 500, 1000, 1500, 2000, 2500]                                                                                                   |
|           | 150, 200, 250, 300, 350, 400, 500, 600, 700, 800, 900, 1000, 1200, 1400, 1600, 1800, 2000, 2500, 3000, 3500                                   |
| U38 – N3  | 50, 100, 150, 200, 250, 300, 350, 400, 500, 600, 700, 800, 900, 1000, 1200, 1400, 1600, 1800                                                  |
|           | 50 & [25, 70, 90, 110, 130] ± [50, 100, 150]                                                                                                  |
|           | 100 & [25, 70, 90, 110, 130, 170, 190, 210, 230, 270, 290, 310, -100] ± [50, 150, 250]                                                        |
|           | 150 & [25, 70, 90, 110, 130, , 170, 190, 210, 230, 270, 290, 310, 330, 350, 370, 390, 410, 430, 450, -100] ± [50, 150, 250]                   |
|           | 200 & [25, 70, 90, 110, 130, 170, 190, 210, 230, 270, 290, 310, 330, 350, 370, 390, 410, 430, 450, 475, 500, 550, 600, -100] ± [50, 150, 250] |
|           | 300 & ± [30, 60, 90, 120, 150, 180, 210, 250, 300, 350, 400, 500, 600, 700, 800]                                                              |
|           | 600 & ± [40, 80, 120, 160, 200, 240, 300, 400, 500, 600, 800, 1000, 1200, 1400, 1600]                                                         |
| U42 – N3  | 100, 150, 200, 250, 300, 350, 400, 500, 600, 700, 800, 900, 1000, 1200, 1400, 1600, 1800, 2000                                                |
|           | 200 & ± [40, 60, 80, 100, 120, 140, 160, 180, 200, 225, 250, 300, 350, 400, 500]                                                              |
|           | 400 & ± [30, 60, 90, 120, 150, 180, 210, 250, 300, 350, 400, 500, 600, 700, 800]                                                              |
|           | 600 & ± [40, 80, 120, 160, 200, 240, 300, 400, 500, 600, 800, 1000, 1200, 1400, 1600, 2000]                                                   |
|           | 1000 & ± [100, 200, 300, 400, 500, 600, 700, 900, 1100, 1300, 1500, 2000, 2500, 3000, 3500, 4000]                                             |
| G43 – N1  | 100, 150, 200, 250, 300, 350, 400, 500, 600, 700, 800, 900, 1000, 1200, 1400, 1600, 1800, 2000                                                |
|           | 200 & ± [20, 40, 60, 80, 100, 120, 140, 160, 180, 200, 225, 250, 300, 350, 400, 500]                                                          |
|           | 1000 & ± [100, 200, 300, 400, 500, 600, 700, 900, 1100, 1300, 1500, 2000, 2500, 3000, 3500, 4000]                                             |

| wtTAR at 10°C | On-resonance spinlock power (Hz)/Off-resonance spinlock power (Hz) with [offsets]                        |
|---------------|----------------------------------------------------------------------------------------------------------|
| A27 – C1'     | 100, 150, 200, 300, 400, 500, 600, 700, 800, 900, 1000, 1200, 1400, 1600, 1800, 2000, 2500, 3000         |
|               | 150 & [450] ± [50, 100, 150, 200, 250, 300, 350, 400]                                                    |
|               | 200 & ± [30, 60, 90, 120, 150, 180, 210, 240, 270, 300, 330, 360, 390, 420, 480, 540, 600]               |
|               | 300 & [750, 850] ± [50, 100, 150, 200, 250, 300, 350, 400, 450, 500, 550, 600, 700, 800, 900]            |
|               | 400 & ± [50, 100, 150, 200, 250, 300, 350, 400, 450, 500, 550, 600, 700, 800, 900, 1000, 1200]           |
|               | 1000 & [-1300, -2500, -3000] ± [100, 200, 300, 400, 500, 700, 900, 1100, 1500, 1700, 2000]               |
|               | 1500 & ± [100, 200, 300, 400, 500, 700, 900, 1100, 1500, 1700, 2000, 2500, 3000, 3500, 4000, 5000, 7500] |

|          |                                                                                                                |
|----------|----------------------------------------------------------------------------------------------------------------|
| G26 – C8 | 100, 150, 200, 300, 400, 500, 600, 700, 800, 900, 1000, 1200, 1400, 1600, 1800, 2000, 2500, 3000               |
|          | 200 & ± [30, 60, 90, 120, 150, 180, 210, 240, 270, 300, 330, 360, 390, 420, 480, 540, 600]                     |
|          | 400 & ± [50, 100, 150, 200, 250, 300, 350, 400, 450, 500, 550, 600, 700, 800, 900, 1000, 1200]                 |
|          | 600 & ± [75, 150, 225, 300, 375, 450, 550, 650, 800, 1000, 1200, 1400, 1600]                                   |
|          | 1000 & ± [100, 200, 300, 400, 500, 700, 900, 1100, 1300, 1500, 1700, 2000, 2500, 3000, 3500, 4000, 5000, 7500] |

|                                      |                                                                                                  |
|--------------------------------------|--------------------------------------------------------------------------------------------------|
| <b>wtTAR in 5 mM Mg<sup>2+</sup></b> | <b>On-resonance spinlock power (Hz)/Off-resonance spinlock power (Hz) with [offsets]</b>         |
| A35 – C8                             | 100, 150, 200, 300, 400, 500, 600, 700, 800, 900, 1000, 1200, 1400, 1600, 1800, 2000, 2500, 3000 |
|                                      | 200 & ± [30, 60, 90, 120, 150, 180, 210, 240, 270, 300, 330, 360, 390, 420, 480, 540, 600]       |
|                                      | 400 & ± [50, 100, 150, 200, 250, 300, 350, 400, 450, 500, 550, 600, 700, 800, 900, 1000, 1200]   |
|                                      | 600 & ± [75, 150, 225, 300, 375, 450, 550, 650, 800, 1000, 1200, 1400, 1600]                     |
|                                      | 1000 & ± [100, 200, 300, 400, 500, 700, 900, 1100, 1300, 1500, 1700, 2000, 2500, 3000]           |
| U38 – N3                             | 200, 300, 400, 500, 600, 700, 800, 900, 1000, 1200, 1400, 1600, 1800, 2000, 2500, 3000, 3500     |

|                                           |                                                                                                      |
|-------------------------------------------|------------------------------------------------------------------------------------------------------|
| <b>ΔC24-wtTAR in 5 mM Mg<sup>2+</sup></b> | <b>On-resonance spinlock power (Hz)/Off-resonance spinlock power (Hz) with [offsets]</b>             |
| A35 – C8                                  | 100, 150, 200, 300, 400, 500, 600, 700, 800, 900, 1000, 1200, 1400, 1600, 1800, 2000, 2500, 3000     |
|                                           | 200 & ± [30, 60, 90, 120, 150, 180, 210, 240, 270, 300, 330, 360, 390, 420, 480, 540, 600, 700]      |
|                                           | 400 & ± [50, 100, 150, 200, 250, 300, 350, 400, 450, 500, 550, 600, 700, 800, 900, 1000, 1200, 1500] |
|                                           | 600 & ± [75, 150, 225, 300, 375, 450, 550, 650, 800, 1000, 1200, 1400, 1600]                         |
|                                           | 1000 & ± [100, 200, 300, 400, 500, 700, 900, 1100, 1300, 1500, 1700, 2000, 2500, 3000]               |
| U38 – N3                                  | 150, 200, 300, 400, 500, 600, 700, 800, 900, 1000, 1200, 1400, 1600, 1800, 2000, 2500, 3000          |

**Table 6:** Parameters for R<sub>1ρ</sub> data fitting

ES1 of ΔC24-wtTAR

| ΔC24-wtTAR | Temp. | R <sub>1</sub> (Hz) | R <sub>2</sub> (Hz) | k <sub>ex</sub> (s <sup>-1</sup> ) | k <sub>1</sub> (s <sup>-1</sup> ) | k <sub>-1</sub> (s <sup>-1</sup> ) | Population and Lifetime | Δω <sub>ES</sub> (p.p.m.) |
|------------|-------|---------------------|---------------------|------------------------------------|-----------------------------------|------------------------------------|-------------------------|---------------------------|
| C30 – C1'  | 25°C  | 2.0 ± 0.2           | 26 ± 1              | 27016 ± 1425                       | 4267 ± 1080                       | 22749 ± 5760                       | 16 ± 4 %                | 2.0 ± 0.2                 |
| U31 – C1'  | 25°C  | 1.4 ± 0.2           | 25 ± 1              |                                    |                                   |                                    |                         | 2.2 ± 0.2                 |
| U31 – C6   | 25°C  | 2.1 ± 0.1           | 31 ± 1              |                                    |                                   |                                    |                         | -1.4 ± 0.1                |
| G34 – C1'  | 25°C  | 2.2 ± 0.1           | 28 ± 1              |                                    |                                   |                                    | 44 ± 11 μs              | 2.0 ± 0.2                 |
| G34 – C8   | 25°C  | 1.4 ± 0.1           | 35 ± 2              |                                    |                                   |                                    |                         | 2.6 ± 0.2                 |
| A35 – C1'  | 25°C  | 2.0 ± 0.3           | 22 ± 3              |                                    |                                   |                                    |                         | 2.6 ± 0.3                 |

ES2 of  $\Delta$ C24-wtTAR

| $\Delta$ C24-wtTAR | Temp. | R <sub>1</sub> (Hz) | R <sub>2</sub> (Hz) | k <sub>ex</sub> (s <sup>-1</sup> ) | k <sub>1</sub> (s <sup>-1</sup> ) | k <sub>-1</sub> (s <sup>-1</sup> ) | Population Lifetime | $\Delta\omega_{ES}$ |
|--------------------|-------|---------------------|---------------------|------------------------------------|-----------------------------------|------------------------------------|---------------------|---------------------|
| A22 – C1'          | 25°C  | 1.07 ± 0.07         | 23.7 ± 0.1          | 541 ± 93                           | 0.9 ± 0.2                         | 540 ± 115                          | 0.17 ± 0.02 %       | 1.7 ± 0.3           |
| U23 – C6           | 25°C  | 2.1 ± 0.1           | 31.2 ± 0.2          |                                    |                                   |                                    |                     | -3.5 ± 0.6          |
| G33 – C8           | 25°C  | 1.4 ± 0.1           | 37.2 ± 0.2          |                                    |                                   |                                    |                     | 2.7 ± 0.5           |
| G33 – C1'          | 25°C  | 0.53 ± 0.08         | 21.6 ± 0.1          |                                    |                                   |                                    | 2.4 ± 0.5           |                     |
| A35 – C8           | 25°C  | 1.86 ± 0.03         | 20.55 ± 0.05        |                                    |                                   |                                    | 1.8 ± 0.4 ms        | -2.3 ± 0.1          |
| U38 – N3           | 25°C  | 1.52 ± 0.03         | 6.52 ± 0.03         |                                    |                                   |                                    | -4.5 ± 0.1          |                     |

Individual Fit for U23-C6 in  $\Delta$ C24-wtTAR

| $\Delta$ C24-wtTAR | Temp. | R <sub>1</sub> (Hz) | R <sub>2</sub> (Hz) | k <sub>ex</sub> (s <sup>-1</sup> ) | k <sub>1</sub> (s <sup>-1</sup> ) | k <sub>-1</sub> (s <sup>-1</sup> ) | Population  | $\Delta\omega_{ES}$ |
|--------------------|-------|---------------------|---------------------|------------------------------------|-----------------------------------|------------------------------------|-------------|---------------------|
| U23 – C6           | 25°C  | 2.09 ± 0.07         | 30.5 ± 0.2          | 761 ± 399                          | 2.3 ± 0.9                         | 759 ± 494                          | 0.3 ± 0.1 % | -3.0 ± 0.2          |

ES3 of  $\Delta$ C24-wtTAR

| $\Delta$ C24-wtTAR | Temp. | R <sub>1</sub> (Hz) | R <sub>2</sub> (Hz) | k <sub>ex</sub> (s <sup>-1</sup> ) | k <sub>1</sub> (s <sup>-1</sup> ) | k <sub>-1</sub> (s <sup>-1</sup> ) | Population Lifetime | $\Delta\omega_{ES}$ |
|--------------------|-------|---------------------|---------------------|------------------------------------|-----------------------------------|------------------------------------|---------------------|---------------------|
| G26 – C8           | 25°C  | 1.12 ± 0.05         | 32.2 ± 0.2          | 5043 ± 327                         | 12 ± 7                            | 5031 ± 372                         | 0.24 ± 0.01 %       | 4.1 ± 0.2           |
| A27 – C1'          | 25°C  | -0.12 ± 0.07        | 38.9 ± 0.4          |                                    |                                   |                                    | 19 ± 15 μs          | -7.5 ± 0.2          |

ES3 of wtTAR

| wtTAR     | Temp. | R <sub>1</sub> (Hz) | R <sub>2</sub> (Hz) | k <sub>ex</sub> (s <sup>-1</sup> ) | k <sub>1</sub> (s <sup>-1</sup> ) | k <sub>-1</sub> (s <sup>-1</sup> ) | Population Lifetime | $\Delta\omega_{ES}$ |
|-----------|-------|---------------------|---------------------|------------------------------------|-----------------------------------|------------------------------------|---------------------|---------------------|
| G26 – C8  | 10°C  | 1.29 ± 0.08         | 52.4 ± 0.2          | 2303 ± 387                         | 4.3 ± 0.8                         | 2299 ± 425                         | 0.18 ± 0.01 %       | 4.5 ± 0.3           |
| A27 – C1' | 10°C  | 1.19 ± 0.2          | 56.82 ± 0.4         |                                    |                                   |                                    | 434 ± 80 μs         | -6.5 ± 0.9          |

ES of  $\Delta$ C24-wtTAR in the presence of 5 mM Mg<sup>2+</sup>

| $\Delta$ C24-wtTAR | Temp. | R <sub>1</sub> (Hz) | R <sub>2</sub> (Hz) | k <sub>ex</sub> (s <sup>-1</sup> ) | k <sub>1</sub> (s <sup>-1</sup> ) | k <sub>-1</sub> (s <sup>-1</sup> ) | Population | $\Delta\omega_{ES}$ |
|--------------------|-------|---------------------|---------------------|------------------------------------|-----------------------------------|------------------------------------|------------|---------------------|
| A35-C8             | 25°C  | 0.06 ± 0.06         | 28 ± 2              | 18583 ± 1643                       | 750 ± 200                         | 17833 ± 4730                       | 4 ± 1 %    | -3.1 ± 0.3          |

ES of wtTAR in the presence of 5 mM Mg<sup>2+</sup>

| wtTAR  | Temp. | R <sub>1</sub> (Hz) | R <sub>2</sub> (Hz) | k <sub>ex</sub> (s <sup>-1</sup> ) | k <sub>1</sub> (s <sup>-1</sup> ) | k <sub>-1</sub> (s <sup>-1</sup> ) | Population | Δω <sub>ES</sub> |
|--------|-------|---------------------|---------------------|------------------------------------|-----------------------------------|------------------------------------|------------|------------------|
| A35-C8 | 25°C  | -0.52 ± 0.07        | 30 ± 1              | 13303<br>± 930                     | 348 ±<br>86                       | 12954<br>± 2829                    | 2.6 ± 0.5% | -3.0 ± 0.3       |

**Table 7:** Comparison of the individual fitted parameters from R<sub>1ρ</sub> using and 2- and 3-state exchange with no minor exchange in a linear topology, for ΔC24-wtTAR A27 – C1' at 25°C

| ΔC24-wtTAR | Parameters                              | 2-state (GS, ES3) | 3-state (GS, ES2, ES3) |
|------------|-----------------------------------------|-------------------|------------------------|
| A27 – C1'  | R <sub>1</sub> (Hz)                     | -0.14 ± 0.08      | -0.21 ± 0.8            |
|            | R <sub>2</sub> (Hz)                     | 39.2 ± 0.4        | 39.8 ± 0.4             |
|            | k <sub>ex</sub> (s <sup>-1</sup> ), ES2 | -                 | 2014 ± 1263            |
|            | Pop. ES2                                | -                 | 0.15 ± 0.06%           |
|            | Δω <sub>ES2</sub>                       | -                 | -2.1 ± 0.8             |
|            | k <sub>ex</sub> (s <sup>-1</sup> ), ES3 | 4879 ± 456        | 4012 ± 560             |
|            | Pop. ES3                                | 0.229 ± 0.009%    | 0.20 ± 0.01%           |
|            | Δω <sub>ES3</sub>                       | -7.6 ± 0.2        | -8.3 ± 0.3             |
|            | Reduced χ <sup>2</sup>                  | 0.28              | 0.26                   |
|            | R <sup>2</sup>                          | 0.999             | 0.998                  |
| AIC Test   | 3-State                                 |                   |                        |

## REFERENCES

- [1] Lee, J., Dethoff, E. A., and Al-Hashimi, H. M. (2014) Invisible RNA state dynamically couples distant motifs., *Proceedings of the National Academy of Sciences of the United States of America* 111, 9485-9490.
- [2] Xue, Y., Kellogg, D., Kimsey, I. J., Sathyamoorthy, B., Stein, Z. W., McBairty, M., and Al-Hashimi, H. M. (2015) *Characterizing RNA Excited States Using NMR Relaxation Dispersion*, 1 ed., Elsevier Inc.
- [3] Lee, J., Vogt, C. E., McBairty, M., and Al-Hashimi, H. M. (2013) Influence of Dimethylsulfoxide on RNA Structure and Ligand Binding, *Analytical Chemistry* 85, 9692-9698.
- [4] Massi, F., Johnson, E., Wang, C., Rance, M., and Palmer, A. G. (2004) NMR R1ρ Rotating-Frame Relaxation with Weak Radio Frequency Fields, *Journal of the American Chemical Society* 126, 2247-2256.
- [5] Parisien, M., and Major, F. (2008) The MC-Fold and MC-Sym pipeline infers RNA structure from sequence data, *Nature* 452, 51-55.
